# Supplementary material
Source: PubMed Central journal article supplement (PMC4974342)

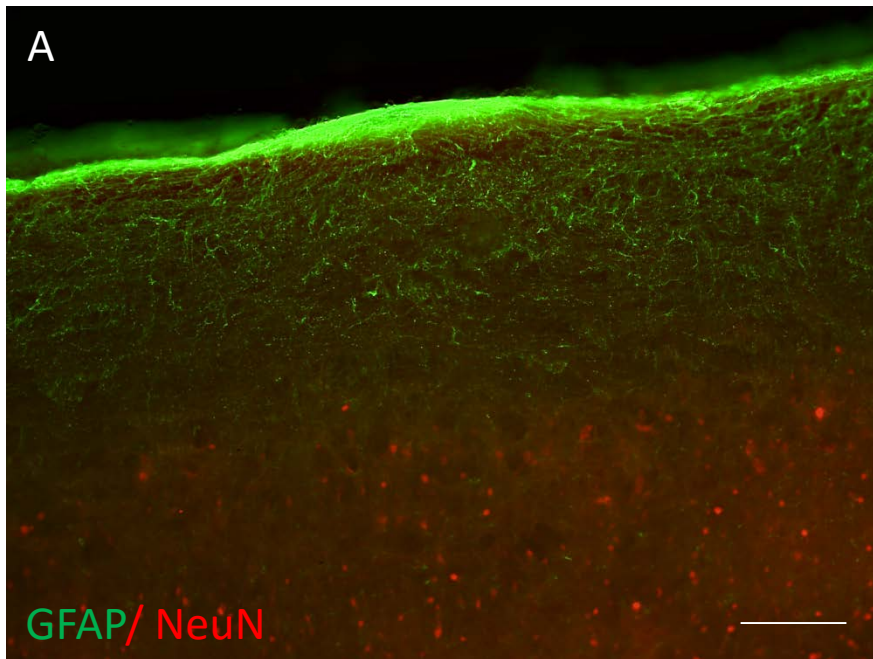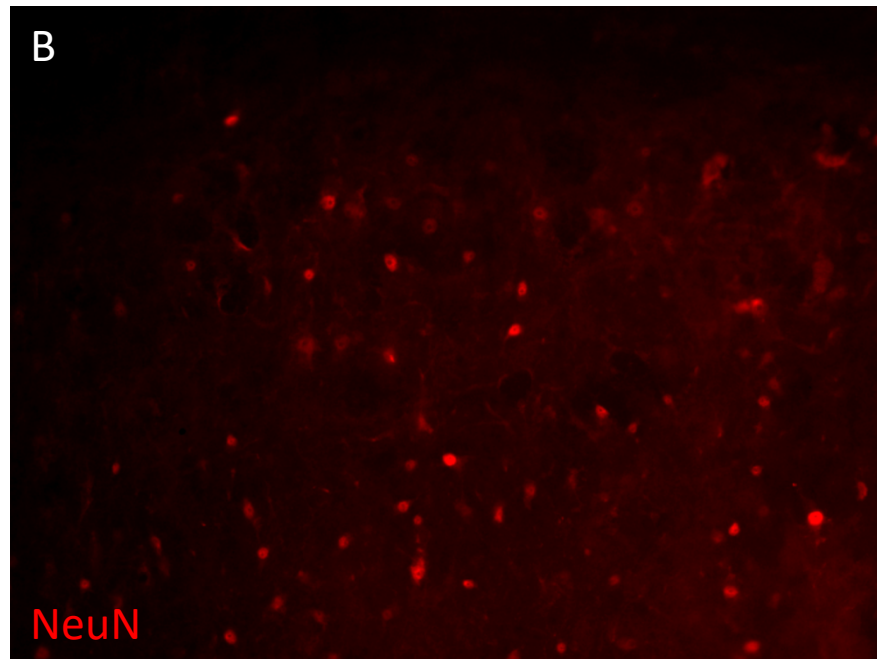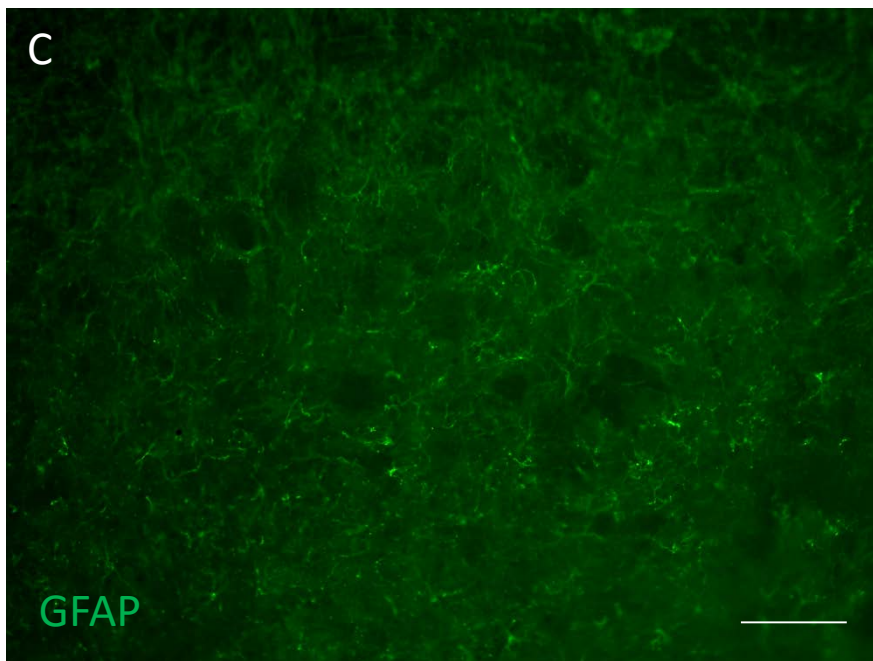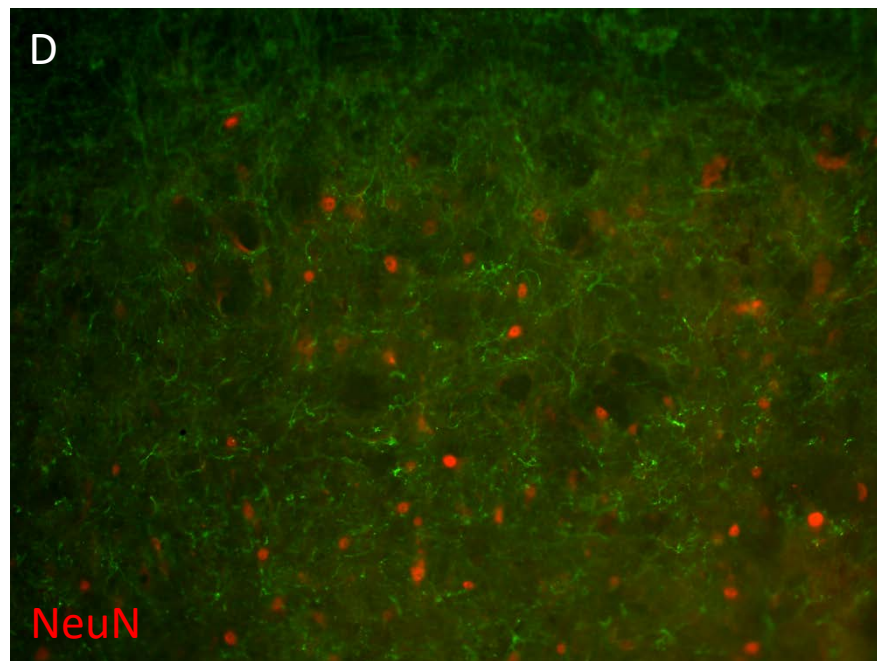

Supplement: 10.1074_M115.057794_mcp.M115.057794-10.pdf [file 10.1074_M115.057794_mcp.M115.057794-10.pdf]
